# Supplementary material for: DLK1 Is Associated with Stemness Phenotype in Medullary Thyroid Carcinoma Cell Lines
Source: Preprints.org preprint supplement (doi:10.20944/preprints202410.0562.v1), 2024-10-08
Supplement: Supplementary file 1 [file supplementary]

**Table S1** - List of antibodies used in flow cytometry

| Antibody | m/pAb | Species | Manufacturer | Reference | Final Dilution |
| --- | --- | --- | --- | --- | --- |
| SOX2 | mAb | Mouse | Abcam | ab79351 | 1:100 |
| OCT3/4 | mAb | Rabbit | Abcam | ab181557 | 1:100 |
| ALDH1A1 | pAb | Goat | Abcam | ab9883 | 1:200 |
| CD44 | pAb | Rabbit | Abcam | ab157197 | 1:100 |
| CD133 | pAb | Rabbit | Abcam | ab16518 | 1:100 |
| MRP1 | mAb | Mouse | Sta. Cruz | sc-365635 | 1:100 |
| MRP3 | pAb | Rabbit | Sta. Cruz | sc-5774 | 1:100 |
| DLK1 | pAb | Rabbit | Abcam | ab21682 | 1:100 |
